# Supplementary material for: Fractal gold modified electrode for ultrasensitive thrombin detection
Source: Royal Society of Chemistry journal article supplement (doi:10.1039/c2nr30826f), 2012-01-01
Supplement: c2nr30826f.pdf [file c2nr30826f.pdf]

## Electronic Supplementary Information

### Fractal Nanogold Electrode for Ultrasensitive Thrombin Detection

Li-Ping Xu,<sup>\*a‡</sup> Shuqi Wang,<sup>a‡</sup> Haifeng Dong,<sup>a</sup> Guodong Liu,<sup>c</sup> Yongqiang Wen,<sup>a</sup> Shutao Wang<sup>b</sup> and Xueji Zhang<sup>\*a</sup>

<sup>a</sup> Research Center for Bioengineering and Sensing Technology, University of Science & Technology Beijing, Beijing 100083, China Fax: 86-10-82375840; Tel: 86-10-82375840; E-mail: xuliping@ustb.edu.cn; zhangxueji@ustb.edu.cn.

<sup>b</sup> Beijing National Laboratory for Molecular Sciences (BNLMS), Key Laboratory of Organic Solids, Laboratory of New Materials, Institute of Chemistry, Chinese Academy of Sciences, Beijing 100190, China

<sup>c</sup> Department of Chemistry and Biochemistry, North Dakota State University, Fargo, North Dakota 58105, USA

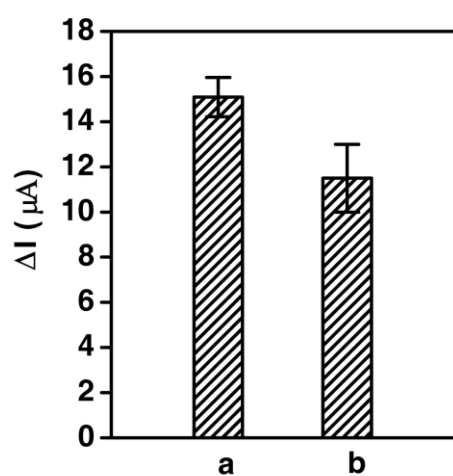

**Fig. S1** Current reduction of biosensors. (a) FracAu biosensor in the buffer containing 1pM thrombin; (b) Bulk Au biosensor in the buffer containing 1nM thrombin. Although FracAu biosensor was placed in 1000 times diluted thrombin solution, the  $\Delta I$  is still 131% of the  $\Delta I$  for bulk Au biosensor, which indicates FracAu electrode is much more sensitive than bulk Au electrode for thrombin detection.

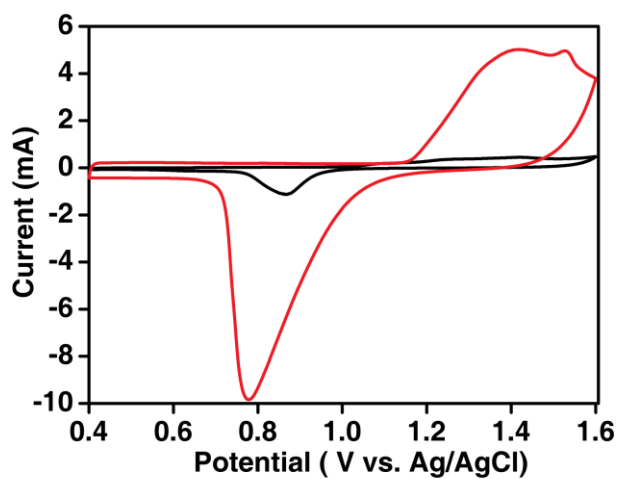

**Fig. S2** Cyclic voltammogram of FracAu (red) and bulk Au (black) electrode in aqueous 0.5M H<sub>2</sub>SO<sub>4</sub> solution. Scan rate is 100mV/s. The surface area of FracAu electrode is about 10.5 times compared with that of bulk Au electrode.
